## Stomach regional specification requires *Hoxa5*-driven mesenchymal-epithelial signaling

Josée Aubin<sup>1</sup>, Ugo Déry<sup>1</sup>, Margot Lemieux<sup>1</sup>, Pierre Chailier<sup>2</sup> and Lucie Jeannotte<sup>1,\*</sup>

<sup>1</sup>Centre de recherche en oncologie de l'Université Laval, Centre Hospitalier Universitaire de Québec, L'Hôtel-Dieu de Québec, Québec G1R 2J6, Canada

<sup>2</sup>Département d'Anatomie et de Biologie Cellulaire, Faculté de Médecine, Université de Sherbrooke, Québec J1H 5N4, Canada

\*Author for correspondence (e-mail: lucie.jeannotte@crhdq.ulaval.ca)

Accepted 22 May 2002

### SUMMARY

The genetic control of gut regionalization relies on a hierarchy of molecular events in which the Hox gene family of transcription factors is suspected to be key participant. We have examined the role of Hox genes in gut patterning using the *Hoxa5*<sup>-/-</sup> mice as a model. *Hoxa5* is expressed in a dynamic fashion in the mesenchymal component of the developing gut. Its loss of function results in gastric enzymatic anomalies in *Hoxa5*<sup>-/-</sup> surviving mutants that are due to perturbed cell specification during stomach development. Histological, biochemical and molecular characterization of the mutant stomach phenotype may be compatible with a homeotic transformation of the gastric mucosa. As the loss of mesenchymal *Hoxa5* function leads to gastric epithelial defects, *Hoxa5* should exert its action

by controlling molecules involved in mesenchymal-epithelial signaling. Indeed, in the absence of *Hoxa5* function, the expression of genes encoding for signaling molecules such as sonic hedgehog, Indian hedgehog, transforming growth factor  $\beta$  family members and fibroblast growth factor 10, is altered. These findings provide insight into the molecular controls of patterning events of the stomach, supporting the notion that *Hoxa5* acts in regionalization and specification of the stomach by setting up the proper domains of expression of signaling molecules.

Key words: Hox genes, *Hoxa5*, Stomach, Organogenesis, Mesenchymal-epithelial signaling

### INTRODUCTION

The study of gut patterning provides a paradigm for the dissection of mechanisms involved in organogenesis. In mice and chick, the gut is derived from two endodermal folds, first the anterior intestinal portal and then later the caudal intestinal portal, that fuse ventrally and move towards each other, joining at the yolk stalk level (Grapin-Botton and Melton, 2000; Roberts, 2000). Concomitantly, the endoderm recruits the splanchnic mesenchyme, and crosstalk between these cell layers leads to the acquisition of regional characteristics along the rostrocaudal gut axis. The esophagus and the stomach originate from the foregut, that also gives rise to the thyroid, lung, liver and pancreas. The midgut develops into the digestive region of the gastrointestinal (GI) tract, while the hindgut forms the colon. Both extremities of the gut, the mouth and the rectum, are mostly ectoderm derivatives.

Whereas gross anatomical boundaries delineate the GI tract, subtle morphological and functional differences progressively arise at late embryonic and postnatal stages (Gordon and Hermiston, 1994). Stomach development illustrates this acquisition of highly specialized features. The stomach emerges as a bulge at around embryonic day (E) 10.0. Its poorly differentiated epithelium undergoes extensive remodeling to generate a complex and continuously renewing

epithelium during adulthood. The stomach epithelium of adult mice is squamous in its proximal part (forestomach) and glandular distally (hindstomach). The latter contains multiple invaginations into the lamina propria, known as gastric units.

The mechanisms that regulate progressive regional and functional cell specification of the gut, and particularly that of the stomach, remain largely unknown, but experimental evidence has established that gut patterning depends on mesenchymal-epithelial interactions. Identified participating signaling molecules include hedgehog (Hh), transforming growth factor  $\beta$  (Tgf $\beta$ ) and fibroblast growth factor (Fgf) family members, as well as their associated receptors. Sonic hedgehog (*Shh*) and Indian hedgehog (*Ihh*) genes coordinate patterning and organogenesis of the gut and its derivatives (Roberts et al., 1995; Chiang et al., 1996; Apelqvist et al., 1997; Litingtung et al., 1998; Pipecelli et al., 1998; Roberts et al., 1998; Takahashi et al., 1998; Hebrok et al., 2000; Ramalho-Santos et al., 2000; Sukegawa et al., 2000). They are expressed in a complementary fashion in the embryonic stomach, *Shh* and *Ihh* transcripts being detected in the fore- and hindstomach, respectively (Bitgood and McMahon, 1995). In *Shh* mutants, the gastric epithelium displays overgrowth and intestinal characteristics. Smooth muscle patterning in the gut also depends on *Shh* and *Ihh* (Ramalho-Santos et al., 2000; Sukegawa et al., 2000).

Hh and bone morphogenetic protein (Bmp) genes are co-expressed at many sites of mesenchymal-epithelial interactions during gut development (Bitgood and McMahon, 1995). In chick embryos, *Bmp2* and *Bmp4* participate in proventriculus (glandular stomach) morphogenesis (Roberts, 2000; Yasugi and Fukuda, 2000). Disruption of their signaling causes both epithelial and mesenchymal anomalies; overexpression of *Bmp2* results in an increased number of gastric units formed, while that of *Bmp4* causes thinning of the mesoderm (Narita et al., 2000; Smith et al., 2001). Furthermore, ectopic expression of the Bmp antagonizing factor *Noggin* inhibits gastric gland formation. Another Tgf $\beta$  superfamily member, Tgf $\beta$ 1, plays a role in gastric pathologies. Inactivation of either *Tgfb1* or its major activator, thrombospondin 1, causes hyperplasia and abnormal cellularity of the glandular epithelium (Crowford et al., 1998).

Mutations of *Fgf10* and its receptor, *Fgfr2* isoform exon IIIb (*Fgfr2b*), also cause dysgenesis of the glandular stomach, demonstrating their involvement in stomach development (De Moerloose et al., 2000; Ohuchi et al., 2000; Revest et al., 2001). Likewise, expression of a soluble dominant-negative *Fgfr2b* receptor in transgenic embryos compromises glandular gastric epithelium development by sequestering a subset of extracellular Fgfs and disrupting Fgf signaling (Celli et al., 1998).

Although some essential mediators of mesenchymal-epithelial crosstalk in the gut are known, the genetic control of regional patterning remains to be elucidated. A developmentally defined hierarchy of molecular events must be involved in the establishment and the fine-tuning of the expression domain of these mediators and their associated receptors. Hox genes have been proposed to be key participants in this process (Grapin-Botton and Melton, 2000; Roberts, 2000). The Hox gene family of transcription factors contains 39 members in human and mouse that are clustered in four complexes (Krumlauf, 1994). Aside from sharing sequence similarity, they possess conserved characteristics throughout evolution. For one, their chromosomal organization reflects a colinear relationship between the position occupied by a gene within a complex and its expression domain along the embryonic axes. This holds true for the gut where Hox genes are expressed in a nested fashion along the rostrocaudal axis in a manner that reproduces their relative order in the complexes (Dollé et al., 1991; Bienz, 1994; Yokouchi et al., 1995; Roberts et al., 1995; Pitera et al., 1999; Zakany and Duboule, 1999; Sakiyama et al., 2001). Moreover, Hox gain- or loss-of-function mutations can lead to gut defects that correlate with the position occupied by the gene within the cluster (Bienz, 1994; Aubin and Jeannotte, 2001). In chick, ectopic expression of *Hoxd13* into midgut mesoderm causes the intestine to adopt colon features (Roberts et al., 1998), while expression of a truncated form of *Hoxa13* in the chick posterior endoderm results in dramatic cloaca malformations (de Santa Barbara and Roberts, 2002). In the mouse, overexpression of *Hoxa4* results in the formation of a megacolon because of anomalies of the enteric nervous system (ENS), whereas ectopic expression of *Hoxc8* in the foregut gives rise to hamartomatous lesions of the gastric epithelium (Wolgemuth et al., 1989; Pollock et al., 1992). Loss of *Hoxc4* function causes esophageal malformation, and that of *Hoxa13*, *Hoxd12* and *Hoxd13* perturb the gut in its most distal part

(Boulet and Capecchi, 1996; Kondo et al., 1996; Warot et al., 1997).

We have shown that *Hoxa5* is involved in lung morphogenesis, in the functional maturation of the midgut, as well as being essential for axial and appendicular specification of the cervicothoracic region (Jeannotte et al., 1993; Aubin et al., 1997; Aubin et al., 1998; Aubin et al., 1999; Aubin et al., 2002). These observations suggest that *Hoxa5* participates in the definition of a variety of structures at a particular axial level, in agreement with its embryonic expression profile (Dony and Gruss, 1987; Larochelle et al., 1999). The majority of *Hoxa5*<sup>-/-</sup> mice die at birth from respiratory distress caused by dysmorphogenesis of the respiratory tract. The loss of *Hoxa5* function also perturbs the acquisition of the adult mode of digestion in the intestine of surviving mutants. *Hoxa5* is expressed in the mesenchyme of the developing respiratory and digestive tracts, whereas defects are mostly found in the epithelium. This supports our hypothesis that *Hoxa5* acts during lung and gut organogenesis by controlling mesenchymal-epithelial interactions. We further strengthen this model by characterizing the stomach phenotype of *Hoxa5*<sup>-/-</sup> mice. Our findings reveal that *Hoxa5* is necessary for proper morphogenesis and functional specification of the stomach, and that its loss of function alters essential signaling cascades implicated in the regional specification of the gastric epithelium.

## MATERIALS AND METHODS

### Mouse strain and genotyping

The *Hoxa5* 129/SvEv mutant strain production and genotyping by Southern analysis have been previously described (Jeannotte et al., 1993; Aubin et al., 1998). Heterozygotes were intercrossed to generate specimens of all possible genotypes. Embryonic age was estimated by considering the morning of the day of the vaginal plug as E0.5.

### Tissue collection, immuno- and histochemical analyses

Tissues were collected from wild-type and *Hoxa5*<sup>-/-</sup> animals sacrificed at different times after birth [postnatal day (P) 0, four wild type and three mutants; P6, one wild type and one mutant; P15, five wild type and five mutants; P17, six wild type and nine mutants; P30, 11 wild type and six mutants]. The digestive tract was removed, kept on ice and subdivided. A stomach segment was immediately frozen in liquid nitrogen for enzymatic dosage. The rest and the other portions of the gut were fixed in cold 4% paraformaldehyde in phosphate-buffered saline (PBS) followed by paraffin wax embedding. The small intestine was separated in three portions: the duodenum, the jejunum and the ileum. The colon was divided in its proximal and distal thirds. Embryos (E12.5; a minimum of four wild type and six mutants) and embryonic gut specimens (E13.5, one wild type and two mutants; E15.5, two wild type and three mutants; E17.5, two wild type and two mutants; E18.5, four wild type and six mutants) were also harvested and processed for histology.

Sections (6  $\mu$ m; 4  $\mu$ m for embryonic samples) of the gut were stained according to standard procedures to identify specific cell types: Hematoxylin and Eosin, Periodic acid/Schiff (mucus-producing cells), Alcian Blue (acid-mucus-producing cells), and Grimelius silver method (enteroendocrine cells). Zymogenic cells were identified by immunostaining with an anti-intrinsic factor (IF) rabbit polyclonal antibody. Immunohistochemical detection of actively dividing cells was performed using a rabbit polyclonal antibody against the phosphorylated histone H3, a mitotic marker (pH3; Upstate Biotechnology), and a mouse monoclonal antibody recognizing the

proliferating cell nuclear antigen (PCNA; Dako Diagnostics) following the manufacturers' instructions. Apoptotic cells were monitored by terminal transferase (TdT) DNA end-labeling (Giroux and Charron, 1998). Alkaline phosphatase activity was assayed by incubating rehydrated E18.5 wild-type and *Hoxa5*<sup>-/-</sup> stomach sections with BM substrate (Boehringer Mannheim).

### Pepsin enzymatic activity

Function of the gastric mucosa was assayed by measuring pepsin activity resulting from activation of pepsinogen at acid pH using dialyzed 2% hemoglobin as a substrate (Sigma) (Anson and Mirsky, 1932). Protein content was quantified according to Lowry et al. (Lowry et al., 1951). Specific activities were expressed in international units ( $\mu\text{moles minute}^{-1}$  of substrate hydrolyzed) per gram of proteins and compiled according to the genotype. Statistical analyses were carried out according to Student's *t* test. The minimal significance was fixed at  $P < 0.05$ .

### In situ hybridization analyses

The RNA in situ hybridization protocol on sections was based on that described by Jaffe et al. (Jaffe et al., 1990), whereas the whole-mount in situ hybridization protocol was performed as described by Wilkinson and Nieto (Wilkinson and Nieto, 1993). The following murine fragments were used as templates for synthesizing either [<sup>35</sup>S] UTP- or digoxigenin-labeled riboprobes: a 850 bp *Bgl*III-*Hind*III genomic fragment containing the 3'-untranslated region of the *Hoxa5* second exon; a 584 bp mouse *Fgf10* cDNA fragment; a 1 kb *Sma*I-*Eco*RI fragment containing 5' non-coding and coding sequences from the *Bmp4* gene; a 974 bp *Sma*I fragment from the *Tgfb2* cDNA; a 609 bp *Eco*RI-*Sma*I fragment from the *Tgfb3* cDNA; a 642 bp *Eco*RI *Shh* cDNA fragment; a 1.8 kb *Eco*RI *lhh* cDNA fragment; a 841 bp *Eco*RI fragment from the 5' end from the *patched* (*Ptch*) gene; a 1.7 kb fragment from the *Gli* gene; a 2.0 kb *Eco*RI fragment from the *Fgfr2* gene; a 700 bp fragment from the *Nkx2-5* gene; a 951 bp *Eco*RI-*Not*I *Barx1* cDNA fragment; a 700 bp *Eco*RI *Bapx1* cDNA fragment. Care was taken to perform in situ hybridization experiments on equivalent sagittal sections of several specimens to ensure proper interpretation of the patterns observed. Results were presented based on the axis of the gut tube, the forestomach being rostral and the hindstomach, caudal.

### Stomach explant cultures

Stomachs were dissected from E12.5 wild-type embryos. Biological effects of FGF10 were tested by implanting heparin beads (Sigma) impregnated with human recombinant FGF10 (R&D). Heparin beads were rinsed three times and soaked in either reconstitution buffer (0.1% bovine serum albumin in PBS) or FGF10 (50 ng/ $\mu$ l) overnight at 4°C. FGF10- or buffer-soaked beads were implanted into the rostral (14 controls, 14 treated explants) or caudal (14 controls, 15 stimulated explants) region of stomach explants. Explants were then embedded in 1:2 Matrigel (Collaborative Research):BGJb medium containing 0.2 mg/ml ascorbic acid and 0.1% heat-inactivated fetal bovine serum (Gibco BRL) and kept at 37°C for 20 minutes to allow matrix solidification. Subsequently, 0.1 ml of medium was added. Explants were grown at 37°C for 3 days in a 5% CO<sub>2</sub> incubator with a daily change of the overlaying medium. Afterwards, explants were fixed, embedded and sectioned.

## RESULTS

### Dynamic *Hoxa5* expression pattern during stomach morphogenesis and maturation

*Hoxa5* expression has been reported in the gut at E12.5 (Dony and Gruss, 1987; Gaunt et al., 1990; Aubin et al., 1999). We observed *Hoxa5* expression as early as E9.0 in the gut

mesenchyme (not shown). At E9.5, expression was detected in the caudal segment of the foregut encompassing the prospective stomach (not shown). At E10.5, a widespread distribution throughout gastric mesenchyme was observed (Fig. 1A,B). Two days later, a rostrocaudal gradient of expression had formed and *Hoxa5* was more strongly expressed in the hindstomach (Fig. 1C,D). This gradient was still detectable at E15.5 (Fig. 1E). At E17.5, redistribution of the *Hoxa5* transcripts occurred, the signal becoming restricted to the submucosa. The muscular layer was also positive (Fig. 1F-H). The *Hoxa5* expression profile changed concomitantly with the appearance of epithelial ridges and thus accompanied the morphogenetic remodeling of the gastric epithelium and the formation of primordial buds (Karam et al., 1997). While gastric maturation goes on until weaning age, *Hoxa5* expression vanished around P15 (Fig. 1I,J) (Gordon and Hermiston, 1994).

In the hindgut, *Hoxa5* expression pattern evolved comparably to that of the midgut (Aubin et al., 1999). Expression was detected from E9.5 in the mesenchyme and became restricted to the ENS around E17.5. *Hoxa5* expression was maintained in adult myenteric plexus of the colon (not shown).

### Morphological anomalies in the GI tract of *Hoxa5*<sup>-/-</sup> mutants

To determine the role played by *Hoxa5* in gut morphogenesis, we performed histological analyses of the digestive tract during embryogenesis and adulthood (see Figs 2, 4, 5) (Aubin et al., 1999). In all postnatal *Hoxa5*<sup>-/-</sup> specimens, anomalies were observed in the stomach and the proximal colon (Fig. 2A,B,I,J, Fig. 4), whereas the rest of the GI tract, including the different sphincters, appeared normal (Fig. 2C-H,K,L; not shown). In *Hoxa5*<sup>-/-</sup> stomachs, the epithelium was thinner and the submucosal layer was hypertrophied (Fig. 2B, Fig. 4B). In the proximal colon, a reduction in villi length accompanied the thickening of the submucosa (Fig. 2J). Thus, the loss of *Hoxa5* function resulted in morphological alterations specifically in the stomach and the proximal colon.

### Altered gastric function in *Hoxa5*<sup>-/-</sup> mice

The *Hoxa5* mutation causes a delay in the postnatal functional maturation of the intestine (Aubin et al., 1999). We tested if the gastric enzymatic function was also affected in surviving *Hoxa5*<sup>-/-</sup> mice by measuring pepsin activity of wild-type and *Hoxa5*<sup>-/-</sup> stomachs after birth (Fig. 3A). Whereas ontogenetic changes in pepsin activity initiated properly up until P15, statistically significant differences were observed at P17 (wild type, 1607 $\pm$ 154; *Hoxa5*<sup>-/-</sup>, 1180 $\pm$ 88 units/mg protein;  $P < 0.05$ ). These differences were maintained at P30 (wild type, 3109 $\pm$ 333; *Hoxa5*<sup>-/-</sup>, 2144 $\pm$ 248 units/mg protein;  $P < 0.05$ ).

Pepsinogen is released by zymogenic cells upon stimulation by secretagogues produced by enteroendocrine cells. To define if both cell types were correctly represented in the *Hoxa5*<sup>-/-</sup> gastric mucosa, we tested for their presence at P30 using an anti-IF antibody labeling zymogenic cells, and a silver staining technique revealing enteroendocrine cells. A marked reduction in the number of IF-positive cells was observed in *Hoxa5*<sup>-/-</sup> stomachs, some units lacking zymogenic cells (Fig. 3B,C). Furthermore, the number of enteroendocrine cells substantially decreased (Fig. 3D,E). Thus, in *Hoxa5*<sup>-/-</sup> mutants, the lower



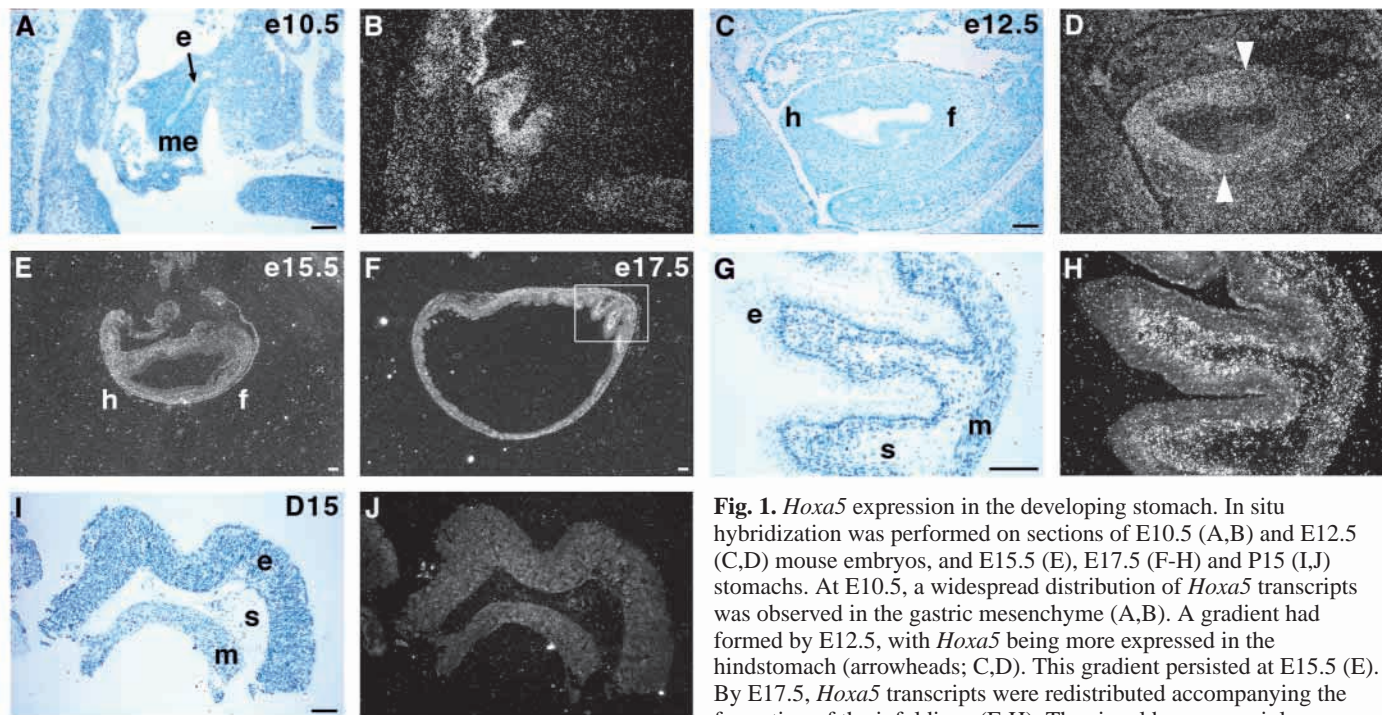

**Fig. 1.** *Hoxa5* expression in the developing stomach. In situ hybridization was performed on sections of E10.5 (A,B) and E12.5 (C,D) mouse embryos, and E15.5 (E), E17.5 (F-H) and P15 (I,J) stomachs. At E10.5, a widespread distribution of *Hoxa5* transcripts was observed in the gastric mesenchyme (A,B). A gradient had formed by E12.5, with *Hoxa5* being more expressed in the hindstomach (arrowheads; C,D). This gradient persisted at E15.5 (E). By E17.5, *Hoxa5* transcripts were redistributed accompanying the formation of the infoldings (F-H). The signal became mainly confined to the submucosal cells underlying the epithelium and expression was observed in the muscular layer (G,H). *Hoxa5* expression stopped around P15 (I,J). e, epithelium; f, forestomach; h, hindstomach; m, muscular layer; me, mesenchyme; s, submucosal layer. Scale bars: 100  $\mu$ m.

pepsin activity correlated with a reduced population of zymogenic and enteroendocrine cells.

#### Cell specification in *Hoxa5*<sup>-/-</sup> gastric and colonic epithelia

The diminished proportion of zymogenic and enteroendocrine cells in P30 *Hoxa5*<sup>-/-</sup> mutants indicated that perturbed cell specification could underlie altered gastric function. The glandular stomach presents cellular regional differences that further subdivide the epithelium into three distinguishable zones: a proximal zymogenic, a middle mucoparietal and a distal pure mucus zones (Rubin et al., 1994; Karam et al., 1997). In the zymogenic zone, four main cell types are present with a stereotyped distribution: mucus-producing and zymogenic cells are found in the upper third and at the base of the unit, respectively, whereas parietal and enteroendocrine cells are distributed along the entire length. In the mid-portion of the gastric unit, the isthmus, consists of a population of stem cells deriving from a common progenitor that repopulates each unit. The mucoparietal zone does not contain zymogenic cells, while both parietal and zymogenic cells are absent from the pure mucous region.

To determine if the *Hoxa5* mutation impaired cell differentiation and gastric unit organization, we investigated the cell types present in the glandular stomach at different ages (Fig. 4; not shown). Appropriate staining procedures showed that all the expected cell types were represented in mutant specimens, albeit with variations in their relative proportion and localization. For example at P15, mucus cells were detected in a higher proportion, while enteroendocrine cells were less abundant in the zymogenic zone (Fig. 4C,D,G,H). At this age, zymogenic cells began to emerge and no major change in their number was observed in contrast to later stages (Fig. 3B,C, Fig. 4E,F). Although the onset of appearance of

zymogenic cells occurred properly, their localization was not restricted to the base of the gastric unit as for wild-type samples. Finally, parietal cells were not significantly affected in the *Hoxa5*<sup>-/-</sup> epithelium (not shown).

The thinning of the *Hoxa5*<sup>-/-</sup> gastric epithelium suggested that proliferation or cell death could be perturbed. We verified the proliferative status of the gastric mucosa by immunostaining with antibodies recognizing mitotic (anti-pH3) or proliferative cells (anti-PCNA). Whereas no obvious difference was noted in embryonic samples, proliferation was diminished in *Hoxa5*<sup>-/-</sup> postnatal samples (Fig. 4I,J). Concomitantly, a fivefold reduction in the number of apoptotic cells was detected by TUNEL assays in the *Hoxa5*<sup>-/-</sup> glandular epithelium (Fig. 4K,L).

In the colon, proliferation and apoptosis were not altered in *Hoxa5*<sup>-/-</sup> mutants, but goblets cells were abnormally distributed along the cuffs (shown for P30; Fig. 4M,N). Thus, the loss of *Hoxa5* function resulted in perturbed cell specification in the stomach and abnormal repartition of acid-mucus producing cells in the proximal colon.

#### Perturbed stomach morphogenesis in *Hoxa5*<sup>-/-</sup> mutants

Cytodifferentiation of the gastric unit initiates during fetal stages and is completed by adulthood. To test if the *Hoxa5* mutation affected stomach morphogenesis before overt cytodifferentiation, we compared wild-type and *Hoxa5*<sup>-/-</sup> embryonic specimens (Fig. 5). The fore- and hindstomachs were readily identified in E13.5 wild-type samples, the former having a monocellular cuboid epithelium (Fig. 5A,C). In

*Hoxa5*<sup>-/-</sup> stomachs, the epithelium was slightly disorganized with a pluricellular appearance and no obvious delimitation between the rostral and caudal regions (Fig. 5B,D). At E15.5, the hindstomach epithelial monolayer appeared pseudostratified in wild-type specimens, whereas it was still

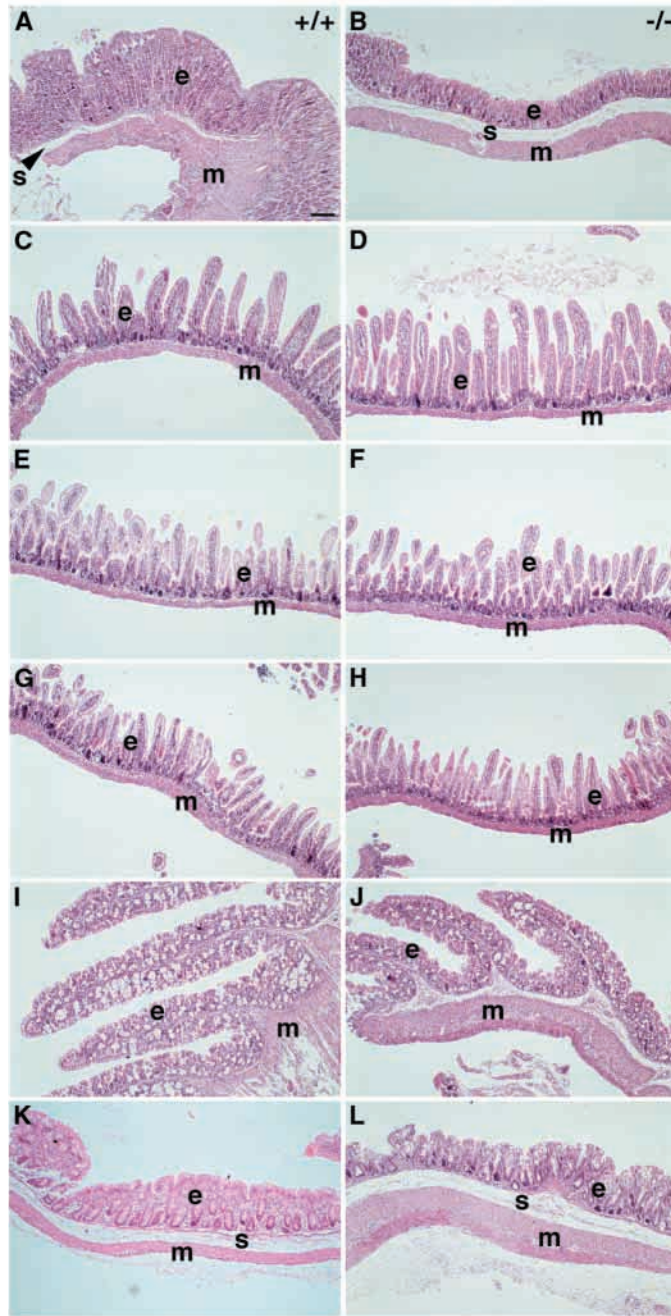

**Fig. 2.** Comparative histology of P15 wild-type and *Hoxa5*<sup>-/-</sup> gut specimens. Hematoxylin and Eosin stained sections of stomach (A,B), duodenum (C,D), jejunum (E,F), ileum (G,H), and proximal (I,J) and distal colon (K,L) from wild-type (A,C,E,G,I,K) and *Hoxa5*<sup>-/-</sup> (B,D,F,H,J,L) mice revealed a thinning of the gastric epithelium (B) and a reduction in villi length in the proximal colon (J) in *Hoxa5*<sup>-/-</sup> mutants. In both structures, the submucosa was hypertrophied. The duodenum (D), the jejunum (F), the ileum (H) and the distal colon (L) appeared morphologically normal. e, epithelium; m, muscular layer; s, submucosa. Scale bar: 100  $\mu$ m.

pluricellular in *Hoxa5*<sup>-/-</sup> mutants (Fig. 5E,F). At this stage onwards, the mutant gastric submucosa was hypertrophied (Fig. 2B, Fig. 4B, Fig. 5F,H,J). Foldings that corresponded to primordial buds of the nascent gastric units, formed in both wild-type and *Hoxa5*<sup>-/-</sup> E17.5 samples (Fig. 5G,H) (Karam et al., 1997). At birth, the disorganized glandular epithelium of *Hoxa5*<sup>-/-</sup> stomach was thinner (Fig. 5I,J). Therefore, abnormal morphogenesis preceded altered cellular specification and function of the gastric epithelium of *Hoxa5*<sup>-/-</sup> animals.

Alkaline phosphatase activity is a common marker of intestinal transformation of the stomach, a phenomenon often linked to a precancerous state (Kawachi et al., 1976; Ramalho-Santos et al., 2000). To define if abnormal cytodifferentiation of the gastric unit was due to the acquisition of intestinal-like characteristics in *Hoxa5*<sup>-/-</sup> mutants, we tested alkaline phosphatase activity at E18.5 as a majority of mutants die at birth (Jeannotte et al., 1993; Aubin et al., 1997). Enzymatic activity was present in the intestine and a slight reactivity was detected in the most distal part of the hindstomach in wild-type samples (Fig. 6A). By contrast, enzymatic activity was detected at higher levels and expanded more rostrally in the hindstomach of mutants, extending up to the forestomach in some instances (Fig. 6B,C; not shown). Thus, the loss of *Hoxa5* function perturbed homeosis of the gastric mucosa.

### Expression of signaling molecules in *Hoxa5*<sup>-/-</sup> stomach

As the loss of mesenchymal *Hoxa5* function led to gastric epithelial defects, we hypothesized that *Hoxa5* could exert its action by controlling molecules involved in mesenchymal-epithelial signaling. Observations that *Hoxa5* controls mesenchyme-epithelium crosstalk during lung and intestine morphogenesis support this model (Aubin et al., 1997; Aubin et al., 1999).

We first examined *Shh* and *Ihh* expression at E12.5. In controls, *Shh* displayed a rostrocaudal gradient of expression with higher levels of transcripts in the forestomach epithelium, whereas *Ihh* expression was confined to the caudal epithelium (Fig. 7A,C). In *Hoxa5*<sup>-/-</sup> stomachs, *Ihh* domain of expression extended toward the rostral region of the stomach, while that of *Shh* became more restricted in the forestomach (Fig. 7B,D). Hedgehogs induce the expression of their receptor *Ptc* in the adjacent mesenchyme, which in turn activates *Gli* gene expression (Goodrich et al., 1996). In *Hoxa5*<sup>-/-</sup> stomachs, *Ptc* and *Gli* signals slightly increased compared with wild-type samples (Fig. 7E-H). Mesenchymal *Bmp4* expression accompanies the epithelial *Shh* expression (Bitgood and McMahon, 1995). Furthermore, *Shh* signaling can induce *Bmp4* expression in gut mesenchyme (Roberts et al., 1995; Roberts et al., 1998; Narita et al., 2000). In *Hoxa5*<sup>-/-</sup> mutants, a decrease in *Bmp4* expression in the mesenchyme abutting the epithelium paralleled that of *Shh* (Fig. 7K,L).

*Fgf10* expression displayed a gradient in stomach mesenchyme. High expression was found in the hindstomach that decreased to background levels in the forestomach (Fig. 7I). In *Hoxa5*<sup>-/-</sup> mutants, the limit of expression of *Fgf10* was displaced rostrally (Fig. 7J). Its receptor *Fgfr2* was expressed in a complementary way in the epithelium, high levels being found in the forestomach. A weaker expression following the same gradient was observed in the mesenchyme. However,



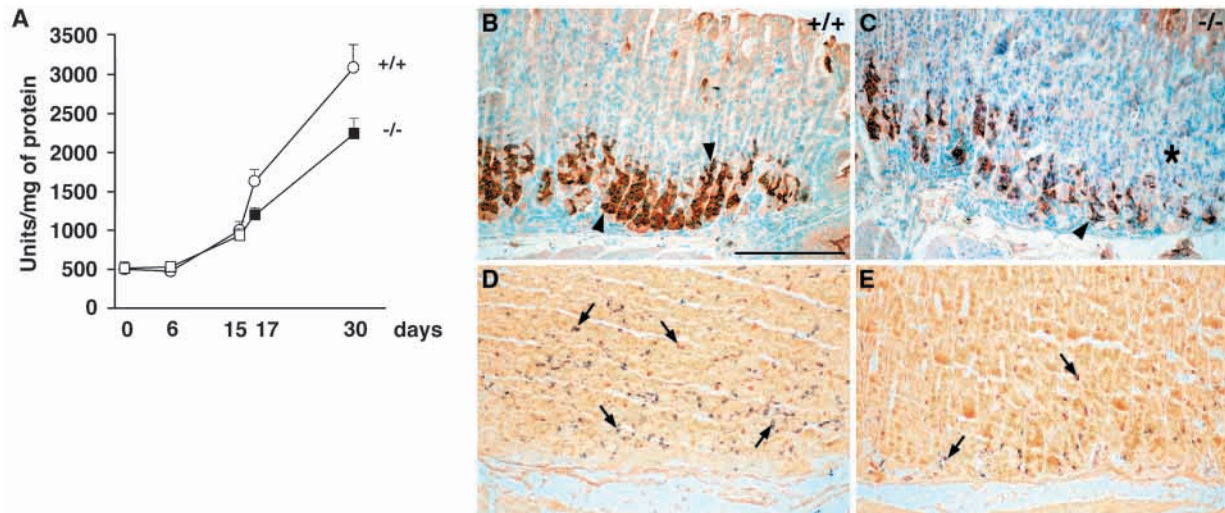

**Fig. 3.** Functional analysis of wild-type and *Hoxa5*<sup>-/-</sup> stomachs. (A) Postnatal ontogeny of pepsin activity in the stomach of wild-type (circles) and *Hoxa5*<sup>-/-</sup> (squares) mice at different time points. Pepsin activity in *Hoxa5*<sup>-/-</sup> mutants remained statistically lower (black squares) at P17 and P30 compared with wild-type samples. IF immunostaining (B,C) and silver staining (D,E) showed that reduced enzymatic activity correlated with a decrease in zymogenic cells (arrowheads) and enteroendocrine cells (arrows) in *Hoxa5*<sup>-/-</sup> mutants (C,E) compared with wild-type specimens (B,D). Some gastric units were deprived of zymogenic cells (asterisk). Scale bar: 100  $\mu$ m.

*Fgfr2* expression was not affected in *Hoxa5*<sup>-/-</sup> mutants (not shown).

*Tgfb1* expression in wild-type stomachs was restricted to a peri-epithelial cell layer. In contrast, patches of highly expressing cells were scattered throughout the mesenchyme in *Hoxa5*<sup>-/-</sup> stomachs (Fig. 7M,N). In the case of *Tgfb3*, a gain of expression was observed in the gastric mesenchyme of mutants (Fig. 7O,P).

We also tested the expression of the *Barx1*, *Bapx1* (*Nkx3-2*) and *Nkx2-5* genes encoding transcription factors that provide useful markers of stomach and pylorus development (Tissier-Seta et al., 1995; Smith et al., 2000; Nielsen et al., 2001). A decrease of *Barx1* expression was detected in the mesenchyme of *Hoxa5*<sup>-/-</sup> stomachs (Fig. 7Q,R). By contrast, no change in the expression profile of the *Bapx1* and *Nkx2-5* genes, both of which were strongly expressed at the stomach-duodenum transition region, was observed correlating with the absence of morphological anomalies of the pyloric sphincter in *Hoxa5*<sup>-/-</sup> mutants (Fig. 7S,T; not shown).

Altogether, these observations demonstrate that the loss of mesenchymal *Hoxa5* function alters the expression of several molecules involved in mesenchymal-epithelial signaling during stomach morphogenesis.

### Impact of FGF10 on gene expression in the stomach

Mesenchyme-expressed genes that displayed perturbed expression in *Hoxa5*<sup>-/-</sup> stomachs represent likely candidates for mediating *Hoxa5* action during stomach morphogenesis. To test the capacity of FGF10 to modulate *Shh* and *Ihh* expression in the gastric epithelium, we cultured E12.5 embryonic stomach explants with recombinant FGF10-soaked beads and we performed in situ hybridization experiments. No major change in *Ihh* expression occurred when a FGF10 bead was implanted in the forestomach, even after overexposure (Fig. 8C). In contrast, implantation of the FGF10 bead in the hindstomach resulted in a localized increase in *Ihh* expression

(Fig. 8B). No effect was observed with control beads (Fig. 8A). No change in *Shh* expression was observed in all conditions tested (not shown). Thus, mesenchymal FGF10 may modulate *Ihh* expression in the underlying epithelium specifically in the hindstomach.

## DISCUSSION

### Hox genes and gut morphogenesis

The present study establishes the importance of *Hoxa5* in proper regionalization of the foregut as it acts in cell specification and function of the hindstomach. So far, it is mostly the action of 5' located Hox genes during hindgut patterning that has been examined in mice. Whereas the forestomach does not display overt morphological alterations, glandular stomach development is impaired in *Hoxa5*<sup>-/-</sup> mutants. This observation correlates with the fact that *Hoxa5* expression is stronger in the hindstomach at early stages of stomach morphogenesis. Interestingly in chick, *Hoxa5* presents a similar expression pattern during stomach formation (Sakiyama et al., 2001). First, *Hoxa5* transcripts are detected throughout the stomach. With time, they become confined to the proventriculus and are excluded from the gizzard (the muscular stomach). The analogy in the progression of *Hoxa5* expression in chick and mouse stomachs suggests that *Hoxa5* regulatory mechanisms may be conserved between species. In support of that, a regulatory element essential for the activation of *Hoxb1* expression in the gut was identified in chick and mouse (Huang et al., 1998). In the case of *Hoxa5*, we have found a DNA control region able to reproduce the *Hoxa5* endogenous gradient of expression in the mouse embryonic stomach (J. Moreau and L. J., unpublished).

The nested expression profile of Hox genes during gut development is consistent with the existence of an enteric Hox code in vertebrates. The defects observed in *Hoxc4*, *Hoxa5*,

*Hoxd12*, *Hoxa13* and *Hoxd13* mutants reflect the colinear relationship existing between the domains of action and expression of a Hox gene along the gut axis (Boulet and Capocchi, 1996; Kondo et al., 1996; Warot et al., 1996). Furthermore, the deletion of HoxD cluster genes from *Hoxd4* to *Hoxd13* results in gut alterations from stomach to colon

(Zakany and Duboule, 1999). It has been proposed that the original purpose of Hox genes was to pattern the gut, being co-opted afterwards to pattern other morphological structures such as the skeleton (Coates and Cohn, 1998). One might therefore expect that Hox gene function in gut regional patterning will be highly conserved throughout evolution. In that regard, a parallel can be drawn between the anomalies encountered in the gut of *Hoxa5*<sup>-/-</sup> mice and those reported in *sex combs reduced* (*scr*) *Drosophila* mutants. *scr* is the *Hoxa5* ortholog and its loss of function leads to the absence of the gastric caeca at the foregut-midgut boundary (Reuter and Scott, 1990). *scr* is also expressed in the posterior part of the midgut, where it may play a role in the formation of the fourth midgut constriction (LeMotte et al., 1989; Reuter et al., 1990). Both the gastric caecae and the fourth constriction correspond to functional frontiers separating the midgut from the rest of the digestive tract in *Drosophila*. Analogously in *Hoxa5*<sup>-/-</sup> mutants, morphological anomalies are encountered in the regions delimiting the midgut: the stomach and the proximal colon. Although we cannot exclude the possibility that the *Hoxa5* mutation could interfere with the expression of 5' located Hox genes that could result in colonic anomalies, the similarity between *Hoxa5* and *scr* expression patterns and function during gut development agrees with a conserved role of this paralog group in the delimitation of functional midgut boundaries.

#### Homeotic transformation of the gastric mucosa in *Hoxa5*<sup>-/-</sup> mutants

Cell fate is altered in the gastric epithelium of *Hoxa5* mutants and the changes observed, based on histological, biochemical and molecular criteria may be compatible with a homeotic transformation of the mucosa. As mentioned, the cellular composition of the glandular stomach progresses from a proximal zymogenic zone to a pure mucous region in the vicinity of the pylorus. Our analyses of the proportion of the different cell types observed in the zymogenic zone of the stomach are in accordance with the acquisition of more distal characteristics. Hence, the increase in the number of mucus-producing cells is combined to a decrease in zymogenic and enteroendocrine cells in the zymogenic region. In fact, some gastric units in *Hoxa5*<sup>-/-</sup> mutants are devoid of zymogenic cells, although this cell population emerges at the appropriate

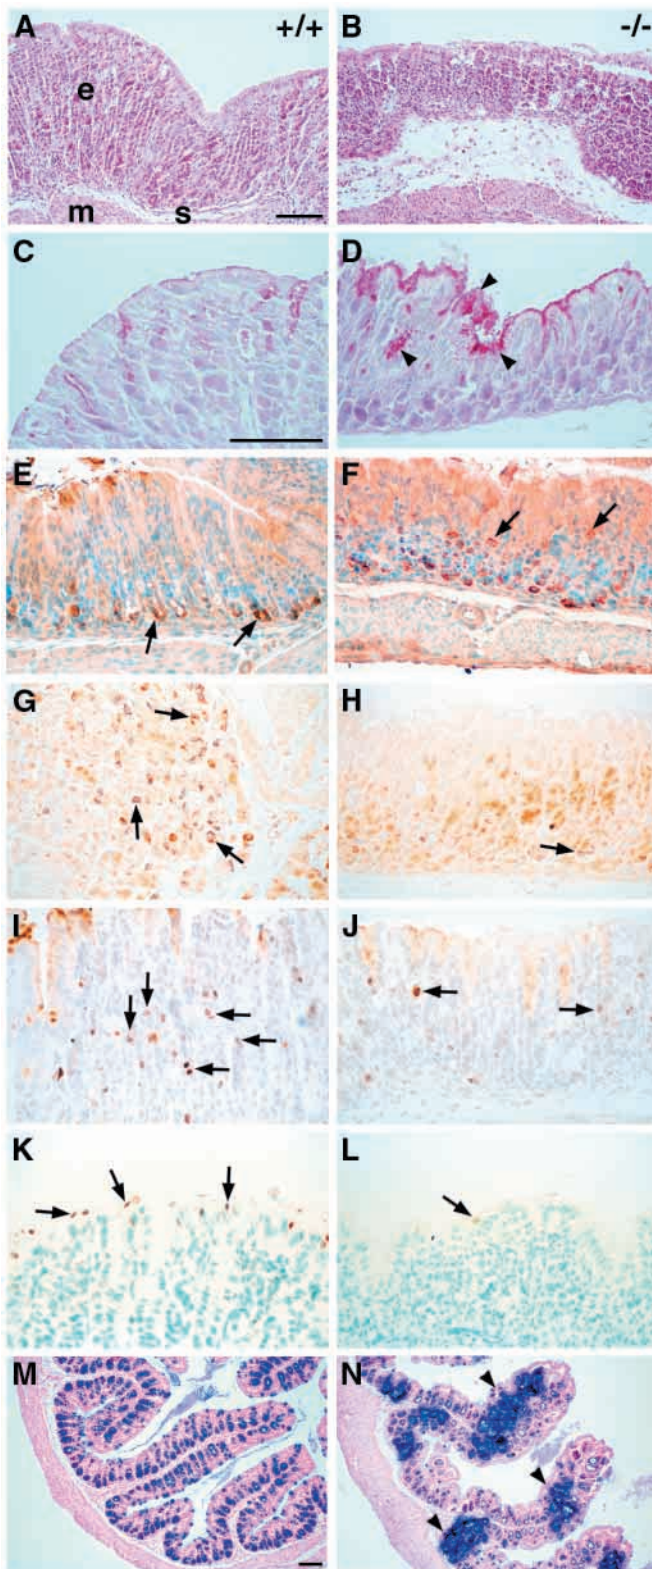

**Fig. 4.** Comparative histology of P15 stomach (A-L) and P30 proximal colon (M,N) of wild-type (A,C,E,G,I,K,M) and *Hoxa5*<sup>-/-</sup> mutants (B,D,F,H,J,L,N). Sections from zymogenic zone of the stomach were stained for representation of cell lineages: Hematoxylin and Eosin (A,B), Periodic acid/Schiff (C,D; mucus cells), and silver staining (G,H; enteroendocrine cells). IF immunostaining detected zymogenic cells (E,F). Proliferating cells were revealed by immunostaining with a pH3 antibody (I,J), and apoptotic cells by the TUNEL method (K,L). *Hoxa5*<sup>-/-</sup> stomach was characterized by a thinner epithelial layer and an hypertrophied submucosal layer (A,B), more mucus producing cells (C,D; arrowheads), an altered distribution of zymogenic cells along the gastric unit (E,F; arrows), and a decreased number of enteroendocrine cells (G,H; arrows). Proliferation in the isthmus (I,J; arrows) and apoptosis (K,L; arrows) were both reduced. In the proximal colon, abnormal distribution of goblet cells was noted in the *Hoxa5*<sup>-/-</sup> epithelium, as revealed by Alcian Blue staining (M,N; arrowheads). Scale bars: 100  $\mu$ m.



time postnatally. Furthermore, significant levels of alkaline phosphatase activity, an intestinal-like feature, are detected in the hindstomach, suggesting that the loss of *Hoxa5* function may lead to a posterior transformation of the glandular stomach. A similar intestinal transformation was reported for *Shh*<sup>-/-</sup> specimens (Ramalho-Santos et al., 2000). Functional redundancy among Hox genes may account for the partial transformation observed. Nonetheless in *Hoxa5*<sup>-/-</sup> mutants, the changes in the expression domain of signaling molecules further support the notion of a posterior transformation. *Shh*

expression gradient retreats in the forestomach whereas *Ihh* and *Fgf10* expression domains expand into the forestomach. The requirement for *Ihh* in the developing intestine has been described while that of *Fgf10* awaits further studies. Moreover, the involvement of *Shh* in a regulatory network controlling the proper development of the gastric mucosa has been demonstrated and our results support the notion that *Shh* participates in the induction and the maintenance of gastric identity as opposed to an intestinal character (Ramalho-Santos et al., 2000; Van den Brink et al., 2001). The phenotypic outcome in the gastric epithelium of *Hoxa5*<sup>-/-</sup> mutants suggests that *Shh* and *Ihh* complementary gradients of expression may be involved in the definition of the squamous and glandular stomach, respectively (Fig. 7) (Bitgood and McMahon, 1995). Therefore, *Hoxa5* may provide regional cues essential for the stomach morphogenesis by ensuring proper signaling molecule expression.

### *Hoxa5* and specification of the gastric epithelium

The anomalies found in *Hoxa5*<sup>-/-</sup> stomachs, such as the perturbed pepsin enzymatic activity in *Hoxa5*<sup>-/-</sup> adults, result from mis-specification of the glandular epithelium. This is in contrast with our previous study where no morphological alterations accompany the delay in the functional enzymatic maturation in the *Hoxa5*<sup>-/-</sup> midgut (Aubin et al., 1999).

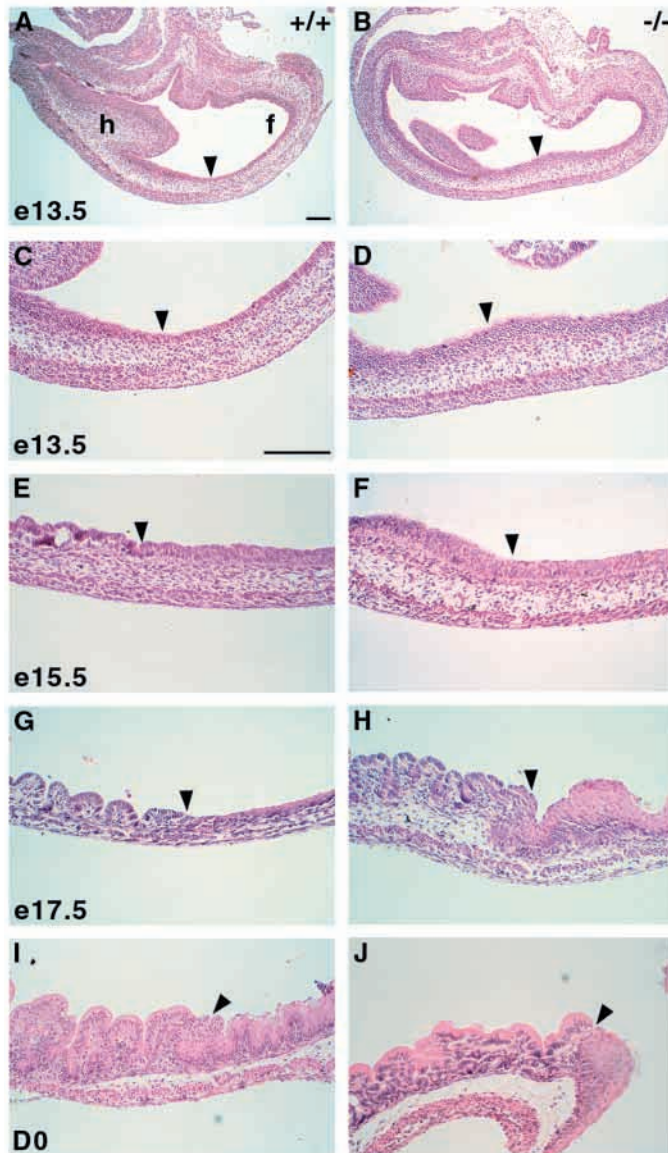

**Fig. 5.** Morphological differences during stomach development between wild type (A,C,E,G,I) and *Hoxa5*<sup>-/-</sup> mutants (B,D,F,H,J). Arrows delineate the prospective squamous (forestomach) and glandular (hindstomach) portions of the stomach. At E13.5 (A-D), a slight disorganization in the gastric submucosa was observed in mutants. By E15.5 (E,F), the reduced cellular density of *Hoxa5*<sup>-/-</sup> mesenchymal layer became obvious, as shown also for E17.5 (G,H). At E17.5, formation of foldings initiated properly but they were reduced in length at birth (I,J). f, forestomach; h, hindstomach. Scale bars: 100 µm.

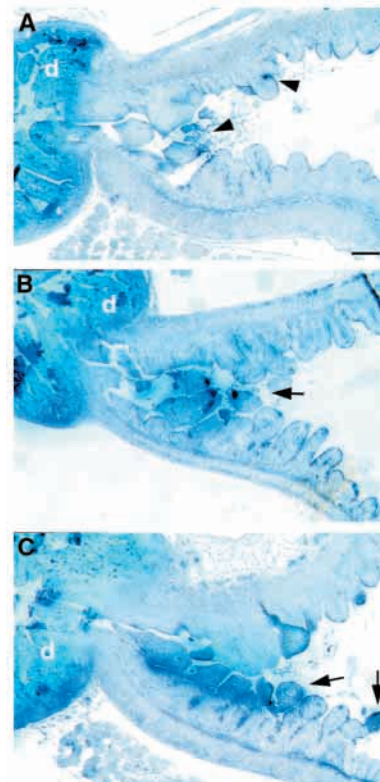

**Fig. 6.** Intestinal characteristics displayed by the *Hoxa5*<sup>-/-</sup> gastric mucosa. Alkaline phosphatase activity was tested on stomach sections from E18.5 wild-type (A) and *Hoxa5*<sup>-/-</sup> (B,C) fetuses. In wild-type specimens, a faint enzymatic activity was present in the intestine and in the most distal part of the hindstomach (A, arrowheads). By contrast, in *Hoxa5*<sup>-/-</sup> mutants, higher levels of reactivity that extended towards the forestomach were detected (B,C, arrows). d, duodenum. Scale bar: 100 µm.



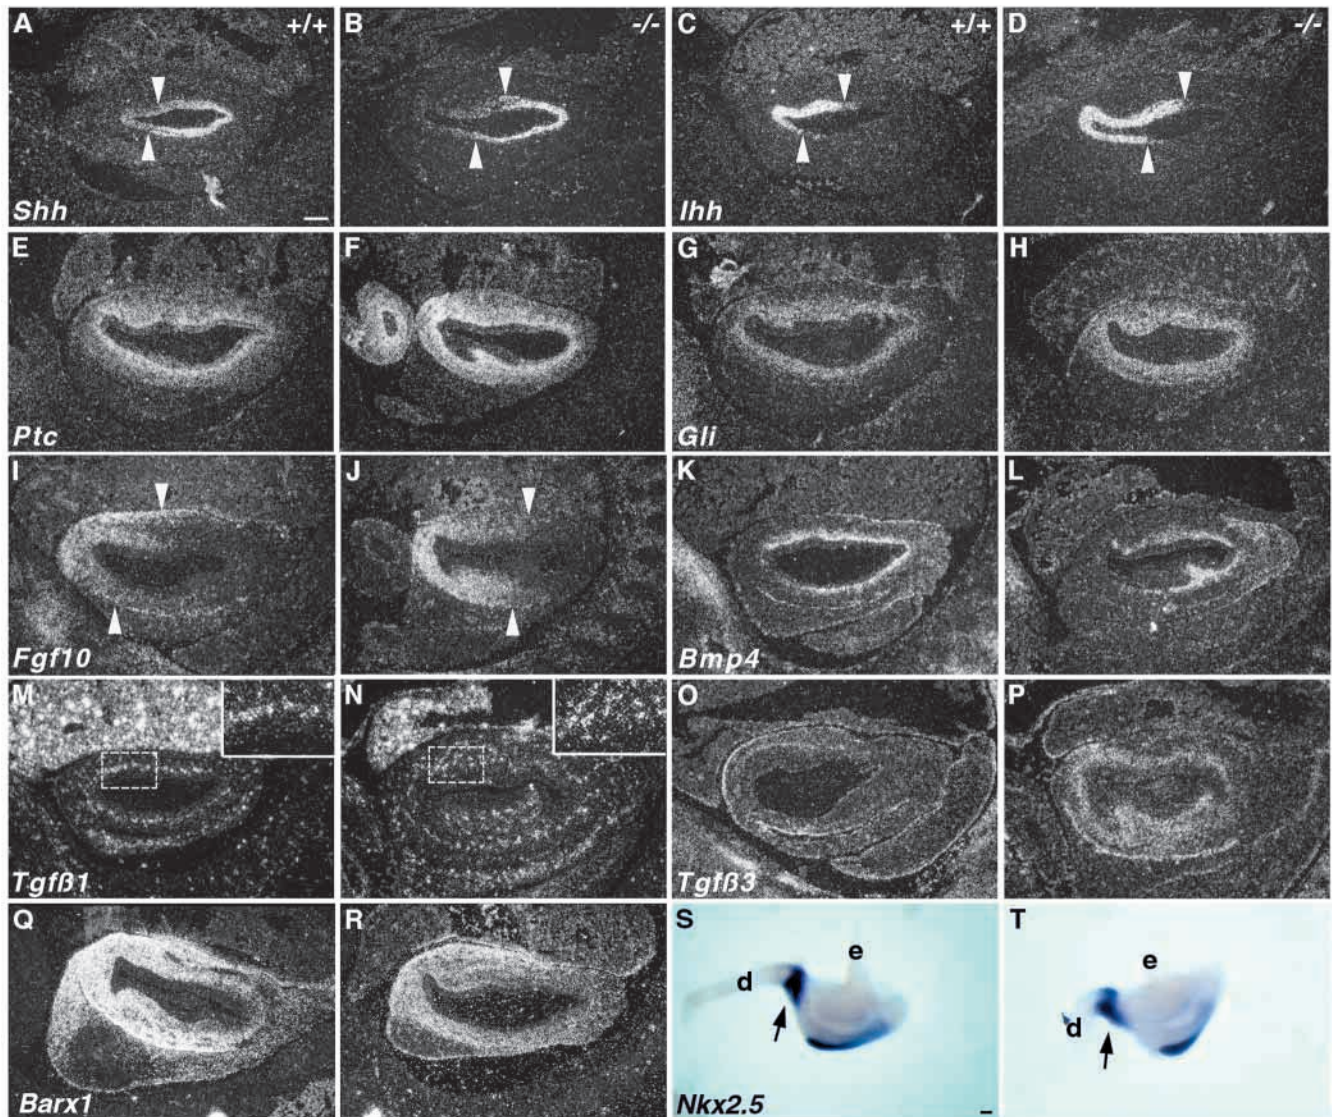

**Fig. 7.** Comparative expression pattern of signaling molecules in wild-type (A,C,E,G,I,K,M,O,Q,S) and *Hoxa5*<sup>-/-</sup> (B,D,F,H,J,L,N,P,R,T) E12.5 stomachs. Sagittal sections were oriented with hindstomach and forestomach from left to right. Arrowheads indicate the limits of the domain of high expression when appropriate. *Shh* (A,B) and *Ihh* (C,D) displayed reciprocal expression gradients in the gastric epithelium. They were expressed in the fore- and hindstomach, respectively. Compared with wild-type samples, high expression of *Shh* was more restricted in *Hoxa5*<sup>-/-</sup> stomachs. In contrast, *Ihh* expression extended more in the forestomach. Expression of *Hh* receptor *Ptc* (E,F) and its downstream effector *Gli* (G,H) was enhanced in *Hoxa5*<sup>-/-</sup> stomachs. *Fgf10* transcripts were confined to the mesenchyme of the hindstomach in wild-type samples (I), while in *Hoxa5*<sup>-/-</sup> mutants (J), they spread into the forestomach. *Bmp4* expression (K,L) was reduced particularly in the hindstomach of mutants. In controls, *Tgfb1* expression was confined to the peri-epithelial zone of the stomach mesenchyme (M, inset). In mutants, *Tgfb1* expression was more disseminated throughout the mesenchyme (N, inset). A gain of *Tgfb3* expression was observed in the mutant mesenchyme (O,P). In contrast, *Barx1* expression decreased in the mutants (Q,R). *Nkx2.5* expression in the pylorus region was unaffected by the lack of *Hoxa5* function (S,T, arrows). d, duodenum; e, esophagus. Scale bar: 100  $\mu$ m.

Therefore, *Hoxa5* action appears more predominant in its anterior-most domain along the gut axis, as we reported for the axial skeleton (Jeannotte et al., 1993; Aubin et al., 1998).

Homeostasis of the gastric glandular epithelium is tightly linked to the balance existing between proliferation, migration and apoptosis. In wild-type adults, a steady state cellular census is maintained among the various epithelial lineages, despite differences in their rate and direction of migration in the gastric unit (Gordon and Hermiston, 1994). In *Hoxa5*<sup>-/-</sup> mutants, the relative proportion of each cell type does not

conform to the expected ratio. Furthermore, reduced proliferation and apoptosis, together with the aberrant migration of zymogenic cells suggest that specification of progenitor cells in the isthmus may constitute a primary defect in *Hoxa5*<sup>-/-</sup> mutants. Stomach glands commence development as polyclonal units, but after selection the vast majority progresses to monoclonal units by adulthood (Thompson et al., 1990; Nomura et al., 1998). The dynamics of *Hoxa5* expression during stomach morphogenesis and maturation appears compatible with the hypothesis that *Hoxa5* may influence the



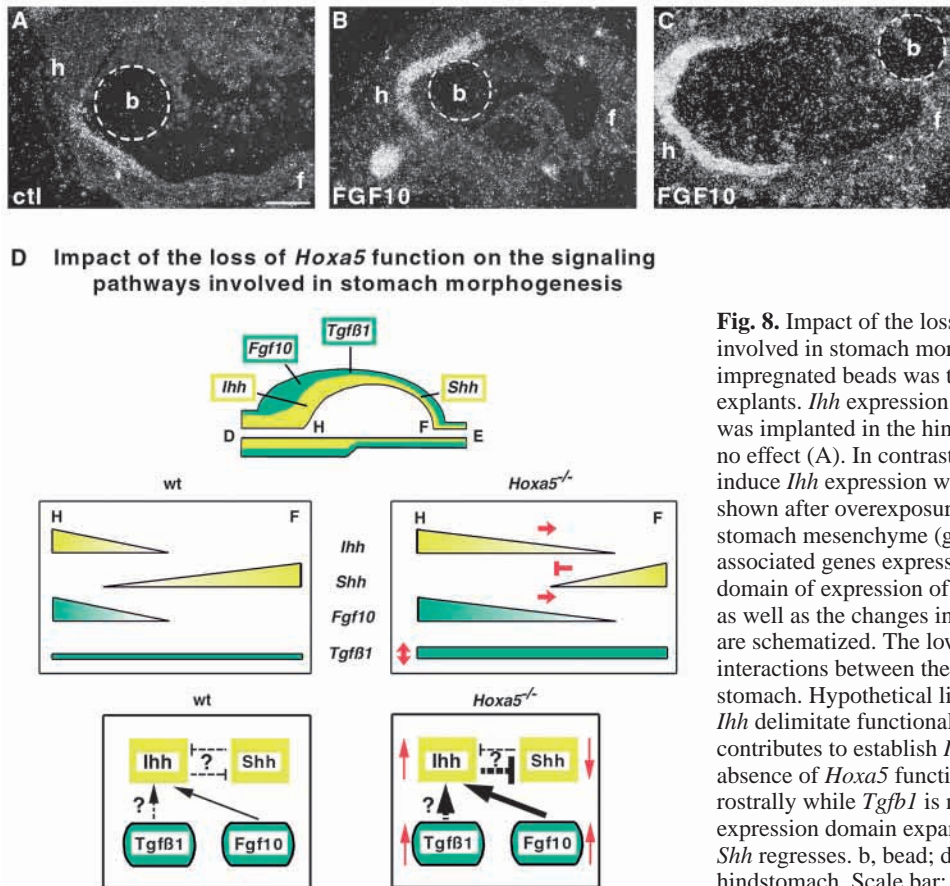

**Fig. 8.** Impact of the loss of *Hoxa5* function on signaling pathways involved in stomach morphogenesis. The biological effect of FGF10-impregnated beads was tested on cultured embryonic stomach explants. *Ihh* expression was stimulated by FGF10 when the bead was implanted in the hindstomach (B), whereas the control bead had no effect (A). In contrast, FGF10-soaked beads were unable to induce *Ihh* expression when positioned in the forestomach (C), as shown after overexposure of the section. (D) Representation of the stomach mesenchyme (green) and endoderm (yellow) with the associated genes expressed during its ontogenesis. The gradient and domain of expression of *Ihh*, *Shh*, *Fgf10* and *Tgfb1* in the wt stomach as well as the changes in their expression pattern in *Hoxa5*<sup>-/-</sup> mutants are schematized. The lower panel represents a model of presumptive interactions between these signaling molecules in the developing stomach. Hypothetical links are indicated by dashed arrows. *Shh* and *Ihh* delimitate functional domains in the gastric endoderm. *Fgf10* contributes to establish *Ihh* expression in the hindstomach. In absence of *Hoxa5* function, *Fgf10* expression domain extends rostrally while *Tgfb1* is no longer restricted. Consequently, *Ihh* expression domain expands toward the forestomach, while that of *Shh* regresses. b, bead; d, duodenum; e, esophagus; f, forestomach; h, hindstomach. Scale bar: 100  $\mu$ m.

selection of monoclonal progenitors in the gastric units. Between E14 and E18, the gastric epithelium organizes itself into primordial buds and *Hoxa5* expression accompanies this remodeling (Karam et al., 1997). From P2 to P14, the proportion of polyclonal gastric glands decreases substantially at a time where *Hoxa5* is still expressed in the submucosa (not shown) (Nomura et al., 1998). Furthermore, *Hoxa5* expression stops when gastric epithelium undertakes its last step of development, with the completion of the gastric unit organization.

### ***Hoxa5* and mesenchymal-epithelial signaling in stomach morphogenesis**

A central issue regarding the role of Hox genes in gut patterning concerns the mechanisms by which they accomplish their function. It has been proposed that the molecular hierarchy downstream of Hox genes must involve secreted factors, whose identification has remained elusive (Roberts, 2000; Smith et al., 2000). We have shown that *Hoxa5* is solely expressed in the mesenchyme, whereas morphological and functional defects are observed in the mutant gastric epithelium, thereby suggesting that *Hoxa5* mutation impinges on signaling cascades. Among the latter is the Hh pathway. An essential step in the patterning of the gut is to exclude *Shh* from the hindstomach and in adjacent regions giving rise to the spleen and the pancreas (Apelqvist et al., 1997; Kim and Melton, 1998; Hebrok et al., 2000; Kim et al., 2000; Ramalho-Santos et al., 2000). For instance, during pancreatic

organogenesis, *Shh* and *Ihh* have distinct effects (Hebrok et al., 2000). In the present case, the expansion of the *Ihh* expression domain combined with the retraction of that of *Shh* in absence of *Hoxa5* function raise the possibility that *Ihh* and *Shh* may counteract each other expression to properly pattern the stomach. This hypothesis remains to be tested and it would be interesting to determine if the *Ihh* expression gradient extents further rostrally in *Shh* mutant stomachs, and vice versa.

Muscular and submucosal development of the stomach also requires *Shh* signaling (Takahashi et al., 1998; Sukegawa et al., 2000). Studies in chick embryos have shown that endoderm-derived *Shh* inhibits smooth muscle development, resulting in the differentiation of non-muscle layers such as the lamina propria and the submucosa. The analysis of *Hh* compound mutants also reveals that *Ihh* and *Shh* share redundant functions in muscle patterning of the gut. In *Hoxa5* mutants, overall Hh signaling is elevated as shown by enhanced *Ptc* and *Gli* expression. Therefore, the hypertrophied submucosa observed in *Hoxa5*<sup>-/-</sup> stomachs may be a consequence of the increased Hh signaling.

*Hoxa5* action in the establishment of *Shh* and *Ihh* gradients necessitates mesenchymally expressed intermediate(s). Bmps have been shown to be important regulators of glandular stomach development (Narita et al., 2000). Moreover in several species, a network exists between *Hox*, *Bmp* and *Hh* gut gene expression (Bienz, 1994; Roberts et al., 1995; Roberts et al., 1998; Smith et al., 2000). For instance, ectopic *Shh* is able to induce *Bmp4* expression in the chick hindgut and in the



stomach (Roberts et al., 1995; Sukegawa et al., 2000). Although a complex situation prevails regarding the capacity of *Shh* to activate *Bmp4* expression in foregut derivatives, it has been proposed that Hox genes influence the regionalized response to *Shh* (Roberts et al., 1995; Bellusci et al., 1996; Bellusci et al., 1997; Roberts et al., 1998; Smith et al., 2000). Even though the induction of *Bmp4* by *Shh* in the stomach mesenchyme has not been directly addressed in the mouse, the change in the *Bmp4* expression pattern observed in *Hoxa5*<sup>-/-</sup> stomachs is in agreement with this notion. It is also possible that *Hoxa5* directly controls *Bmp4* expression in the stomach. In the *Drosophila* midgut, the *Ultrabithorax* gene regulates at the transcriptional level the expression of the *Bmp4* homolog *decapentaplegic* (Reuter et al., 1990; Bienz, 1994; Grieder et al., 1997).

Another essential factor for stomach morphogenesis is *Fgf10*, the expression of which is affected by the loss of *Hoxa5* function. Furthermore, Fgf10 and Shh signaling pathways, along with others, constitute a regulatory network that is essential for proper morphogenesis of other organs. In lung development, Shh may restrict the domain of expression of *Fgf10* (Bellusci et al., 1996; Bellusci et al., 1997; Pipecelli et al., 1998; Lebeche et al., 1999). In pituitary gland development, *Shh* and *Fgf10* also have mutually exclusive domains of expression and their opposite action seems to be a crucial step that allows cells to respond properly to Fgf signals (Trier et al., 2001). In *Hoxa5*<sup>-/-</sup> mutant stomachs, the domain of *Shh* expression regresses, while that of *Fgf10* advances, compatible with the hypothesis that *Shh* acts in restricting *Fgf10* domain to the hindstomach. Alternatively, Fgf10 may also confine *Shh* expression to the forestomach. However, *Shh* downregulation was not observed when FGF10-soaked beads were implanted in the forestomach, even though *Fgfr2* is highly expressed in the forestomach epithelium. Instead, FGF10 appears to act positively on *Ihh* expression, as *Ihh* levels were increased when FGF10 beads were juxtaposed to the hindstomach epithelium.

In *Hoxa5*<sup>-/-</sup> mutant stomachs, restriction of *Tgfb1* and *Tgfb3* expression in the mesenchyme is lost, without influencing negatively *Fgf10*. This observation contrasts with the capacity of Tgfβ1 to limit lung *Fgf10* expression in conjunction with *Shh* (Lebeche et al., 1999). Tissue-specific responses may account for this difference. Tgfβs are known inhibitors of epithelial proliferation and they stimulate extracellular matrix production (Massagué, 1998). The loss of *Tgfb1* function or the mutation of its major activator, thrombospondin 1, causes hyperproliferation of the gastric epithelium (Crowford et al., 1998). The gain of *Tgfb1* and *Tgfb3* expression in absence of *Hoxa5* function correlates with diminished epithelial proliferation and increased thickening of the submucosa. The possibility cannot be excluded that *Tgfb1* and *Tgfb3* may contribute to promote *Ihh* expression in the *Hoxa5*<sup>-/-</sup> stomachs. In osteoblastic cells, Tgfβ1 has been shown to increase *Ihh* mRNA levels (Murakami et al., 1997).

How *Shh*, *Ihh*, Tgfβs and *Fgf10* expression impinge on each other's domain in the developing stomach remains to be determined. Our results provide insight into the molecular controls of patterning events of the stomach (Fig. 8D). Because *Hoxa5* is more highly expressed in the hindstomach, it may act in regionalization and specification of the stomach by setting up the proper domains of expression of *Hh* and *Fgf10*. *Ihh* and *Fgf10* could be part, together with Tgfβs, of a positive

feedback loop that maintains their respective juxtaposed domains. Concomitantly, *Shh* expression is confined to the forestomach. In absence of *Hoxa5* function, enhanced Tgfβs and *Fgf10* expression will lead to the anteriorization of *Ihh* domain, while *Shh* is shifted rostrally. As a consequence, cellular specification in the glandular stomach is altered and results in perturbed enzymatic function in *Hoxa5*<sup>-/-</sup> surviving adults.

The proposed model provides a framework that will help to define how *Hoxa5* is involved in the establishment of signaling networks warranting proper gut patterning. Hox gene products seem to be 'versatile generalists' able to modulate the activity of a panoply of targets at several moments during development to control not only growth and patterning but also details of cell morphogenesis and function (Akam, 1998). In depth analyses of Hox mutant gut phenotypes should underscore the importance of conserved mechanisms underlying mesenchymal-epithelial crosstalk involved in metazoan digestive tract development.

We thank Drs Jean Charron, Phil Soriano and Guy Hamilton for critical comments on the manuscript, Dr David Alpers for the intrinsic factor antibody, and Drs. Richard Harvey, Brigid Hogan, C. C. Hui, Thomas Lufkin, Andrew McMahon, Harold Moses, Liz Robertson, Matthew Scott, Paul Sharpe and Satoshi Tanaka for RNA probes. This work was supported by the CIHR (to L. J.). L. J. is a FRSQ Scholar.

## REFERENCES

- Akam, M. (1998). Hox genes: from master genes to micromanagers. *Curr. Biol.* **8**, 676-678.
- Anson, M. L. and Mirsky, A. E. (1932). The estimation of pepsin with hemoglobin. *J. Gen. Physiol.* **10**, 342-344.
- Apelqvist, A., Ahlgren, U. and Edlund, H. (1997). Sonic hedgehog directs specialised mesoderm differentiation in the intestine and pancreas. *Curr. Biol.* **7**, 801-804.
- Aubin, J. and Jeannotte, L. (2001). Implication des gènes *Hox* dans les processus d'organogenèse chez les mammifères. *Médecine/Sciences* **17**, 54-62.
- Aubin, J., Lemieux, M., Tremblay, M., Bérard, J. and Jeannotte, L. (1997). Early postnatal lethality in *Hoxa-5* mutant mice is attributable to respiratory tract defects. *Dev. Biol.* **192**, 432-445.
- Aubin, J., Lemieux, M., Tremblay, M., Behringer, R. and Jeannotte, L. (1998). Transcriptional interferences at the *Hoxa4/Hoxa5* locus: Importance of correct *Hoxa5* expression for the proper specification of the axial skeleton. *Dev. Dyn.* **212**, 141-156.
- Aubin, J., Chailler, P., Ménard, D. and Jeannotte, L. (1999). Loss of *Hoxa5* gene function in mice perturbs intestinal maturation. *Am. J. Physiol.* **277**, C965-973.
- Aubin, J., Lemieux, M., Moreau, J., Lapointe, L. and Jeannotte, L. (2002). Cooperation of *Hoxa5* and *Pax1* during formation of the pectoral girdle. *Dev. Biol.* **244**, 96-113.
- Bellusci, S., Henderson, R., Winnier, F., Oikawa, T. and Hogan, B. L. (1996). Evidence from normal expression and targeted misexpression that *Bone Morphogenetic Protein-4* (*Bmp-4*) plays a role in mouse embryonic lung morphogenesis. *Development* **122**, 1693-1702.
- Bellusci, S., Furuta, Y., Rush, M. G., Henderson, R., Winnier, F. and Hogan, B. L. (1997). Involvement of sonic hedgehog (*Shh*) in mouse embryonic lung growth and morphogenesis. *Development* **122**, 1693-1702.
- Bienz, M. (1994). Homeotic genes and positional signalling in the *Drosophila*. *Trends Genet.* **10**, 22-26.
- Bitgood, M. J. and McMahon, A. (1995). Hedgehog and Bmp genes are coexpressed at many diverse sites of cell-cell interaction in the mouse embryo. *Dev. Biol.* **172**, 126-138.
- Boulet, A. M. and Cappechi, M. R. (1996). Targeted disruption of the *Hoxc-4* gene causes esophageal defects and vertebral transformations. *Dev. Biol.* **177**, 232-249.
- Celli, G., LaRoche, W. J., Mackem, S., Sharp, R. and Merlino, G. (1998).

- Soluble dominant-negative receptor uncovers essential roles for fibroblast growth factors in multi-organ induction and patterning. *EMBO J.* **17**, 1642-1655.
- Chiang, C., Litingtung, Y., Lee, E., Young, K. E., Corden, J. L., Westphal, H. and Beachy, P. A. (1996). Cyclopia and defective axial patterning in mice lacking sonic hedgehog function. *Nature* **383**, 407-413.
- Coates, M. I. and Cohn, M. J. (1998). Fins, limbs, and tails: outgrowths and axial patterning in vertebrate evolution. *BioEssays* **20**, 371-381.
- Crowford, S. E., Stellmach, V., Murphy-Ullrich, J. E., Ribeiro, S. M. F., Boivin, G. P. and Bouck, N. (1998). Thrombospondin-1 is a major activator of TGF- $\beta$ 1 in vivo. *Cell* **93**, 1159-1170.
- De Moerloose, L., Spencer-Dene, B., Revest, J.-M., Hajihosseini, M., Rosewell, I. and Dickson, C. (2000). An important role for the IIb isoform of fibroblast growth factor receptor 2 (FGFR2) in mesenchymal-epithelial signalling during mouse organogenesis. *Development* **127**, 483-492.
- de Santa Barbara, P. and Roberts, D. J. (2002). Tail gut endoderm and gut/genitourinary/tail development: a new tissue-specific role for *Hoxa13*. *Development* **129**, 551-561.
- Dollé, P., Izpisua-Belmonte, J. C., Boncinelli, E. and Duboule, D. (1991). The Hox-4.8 gene is localized at the 5' extremity of the Hox-4 complex and is expressed in the most posterior parts of the body during development. *Mech. Dev.* **36**, 3-13.
- Dony, C. and Gruss, P. (1987). Specific expression of the Hox 1.3 homeo box gene in murine embryonic structures originating from or induced by the mesoderm. *EMBO J.* **6**, 2965-2975.
- Gaunt, S., Coletta, P. L., Pravtcheva, D. and Sharpe, P. (1990). Mouse *Hox-3.4*: homeobox sequence and embryonic expression patterns compared with other members of the *Hox* gene network. *Development* **109**, 329-339.
- Giroux, S. and Charron, J. (1998). Defective development of the embryonic liver in N-myc-deficient mice. *Dev. Biol.* **195**, 16-18.
- Goodrich, L. V., Johnson, R. L., Milenkovic, L., McMahon, J. A. and Scott, M. P. (1996). Conservation of the hedgehog/patched signaling pathway from flies to mice: induction of a mouse patched gene by Hedgehog. *Genes Dev.* **10**, 301-312.
- Gordon, J. I. and Hermiston, M. L. (1994). Differentiation and self-renewal in the mouse gastrointestinal epithelium. *Curr. Opin. Cell Biol.* **6**, 795-803.
- Grapin-Botton, A. and Melton, D. A. (2000). Endoderm development from patterning to organogenesis. *Trends Genet.* **16**, 124-130.
- Grieder, N. C., Marty, T., Ryoo, H. D., Mann, R. S. and Affolter, M. (1997). Synergistic activation of a Drosophila enhancer by HOM/EXD and DPP signaling. *EMBO J.* **16**, 7402-7410.
- Hebrok, M., Kim, S. K., St-Jacques, B., McMahon, A. P. and Melton, D. A. (2000). Regulation of pancreas development by hedgehog signaling. *Development* **127**, 4905-4913.
- Huang, D., Chen, S. W., Langston, A. W. and Gudas, L. (1998). A conserved retinoic acid responsive element in the murine *Hoxb-1* gene is required for expression in the developing gut. *Development* **125**, 3235-3246.
- Jaffe, L., Jeannotte, L., Bikoff, E. K. and Robertson, E. J. (1990). Analysis of  $\beta_2$ -microglobulin in the developing mouse embryo and placenta. *J. Immunol.* **145**, 3474-3482.
- Jeannotte, L., Lemieux, M., Charron, J., Poirier, F. and Robertson, E. J. (1993). Specification of axial identity in the mouse: role of the *Hoxa-5* (*Hox1.3*) gene. *Genes Dev.* **7**, 2085-2096.
- Karam, S. M., Li, Q. and Gordon, J. I. (1997). Gastric epithelial morphogenesis in normal and transgenic mice. *Am. J. Physiol.* **272**, 1209-1220.
- Kawachi, T., Kurisu, M., Numanyu, N., Sasajima, K. and Sano, T. (1976). Precancerous changes in the stomach. *Cancer Res.* **36**, 2673-2677.
- Kim, S. K. and Melton, D. A. (1998). Pancreas development is promoted by cyclopamine, a Hedgehog signaling inhibitor. *Proc. Natl. Acad. Sci. USA* **95**, 13036-13041.
- Kim, S. K., Hebrok, M., Li, E., Oh, S. P., Schrewe, H., Harmon, E. R., Lee, J. S. and Melton, D. A. (2000). Activin receptor patterning of foregut organogenesis. *Genes Dev.* **14**, 1866-1871.
- Kondo, T., Dollé, P., Zakany, J. and Duboule, D. (1996). Function of posterior HoxD genes in the morphogenesis of the anal sphincter. *Development* **122**, 2651-2659.
- Krumlauf, R. (1994). *Hox* genes in vertebrate development. *Cell* **78**, 191-201.
- Larochelle, C., Tremblay, M., Bernier, D., Aubin, J. and Jeannotte, L. (1999). Multiple cis-acting regulatory regions are required for restricted spatio-temporal *Hoxa5* gene expression. *Dev. Dyn.* **214**, 127-140.
- Lebeche, D., Malpel, S. and Cardoso, W. V. (1999). Fibroblast growth factor interactions in the developing lung. *Mech. Dev.* **86**, 125-136.
- LeMotte, P. K., Kuroiwa, A., Fessler, L. I. and Gehring, W. J. (1989). The homeotic gene Sex Combs Reduced of Drosophila: gene structure and embryonic expression. *EMBO J.* **8**, 219-227.
- Litingtung, Y., Lei, L., Westphal, H. and Chiang, C. (1998). Sonic hedgehog is essential to foregut development. *Nat. Genet.* **20**, 58-61.
- Lowry, O. H., Rosebrough, N. J., Farr, A. L. and Randall, R. J. (1951). Protein measurement using Folin phenol reagent. *J. Biol. Chem.* **193**, 265-275.
- Massagué, J. (1998). TGF- $\beta$  signal transduction. *Ann. Rev. Biochem.* **67**, 753-791.
- Murakami, S., Nifuji, A. and Noda, M. (1997). Expression of Indian hedgehog in osteoblasts and its posttranscriptional regulation by transforming growth factor- $\beta$ . *Endocrinology* **138**, 1972-1978.
- Narita, T., Saitoh, K., Kameda, T., Kuroiwa, A., Mizutani, M., Koike, C., Iba, H. and Yasugi, S. (2000). BMPs are necessary for stomach gland formation in the chicken embryo: a study using virally induced BMP-2 and Noggin expression. *Development* **127**, 981-988.
- Nielsen, C., Murtaugh, L. C., Chyung, J. C., Lassar, A. and Roberts, D. J. (2001). Gizzard formation and the role of *Bapx1*. *Dev. Biol.* **231**, 164-174.
- Nomura, S., Esumi, H., Job, C. and Tan, S.-S. (1998). Lineage and clonal development of gastric glands. *Dev. Biol.* **204**, 124-135.
- Ohuchi, H., Hori, Y., Yamasaki, M., Harada, H., Sekine, K., Kato, S. and Itoh, N. (2000). FGF10 acts as a major ligand for FGF receptor 2 IIb in mouse multi-organ development. *Biochem. Biophys. Res. Commun.* **277**, 643-649.
- Pipecelli, C. V., Lewis, P. M. and McMahon, A. P. (1998). Sonic hedgehog regulates branching morphogenesis in the mammalian lung. *Curr. Biol.* **8**, 1083-1086.
- Pitera, O. E., Smith, V. V., Thorogood, P. and Milla, P. J. (1999). Coordinated expression of 3' *Hox* genes during murine embryonal gut development: an enteric *Hox* code. *Gastroenterology* **117**, 1339-1351.
- Pollock, R. A., Jay, G. and Bieberich, C. J. (1992). Altering the boundaries of *Hox3.1* expression: evidence for antipodal gene regulation. *Cell* **71**, 911-923.
- Ramalho-Santos, M., Melton, D. A. and McMahon, A. P. (2000). Hedgehog signals regulate multiple aspects of gastrointestinal development. *Development* **127**, 2763-2772.
- Reuter, R. and Scott, M. P. (1990). Expression and function of the homeotic genes Antennapedia and Sex combs reduced in the embryonic midgut of Drosophila. *Development* **109**, 289-303.
- Reuter, R., Panganiban, G. E., Hoffmann, F. M. and Scott, M. P. (1990). Homeotic genes regulate the spatial expression of putative growth factors in the visceral mesoderm of Drosophila embryos. *Development* **110**, 1031-1040.
- Revest, J.-M., Spencer-Dene, B., Kerr, K., de Moerloose, L., Rosewell, I. and Dickson, C. (2001). Fibroblast growth factor receptor 2-IIb acts upstream of *Shh* and *Fgf4* and is required for limb bud maintenance but not for the induction of *Fgf8*, *Fgf10*, *Msx1*, or *Bmp4*. *Dev. Biol.* **231**, 47-62.
- Roberts, D. (2000). Molecular mechanisms of development of the gastrointestinal tract. *Dev. Dyn.* **219**, 109-120.
- Roberts, D., Johnson, R. L., Burke, A. C., Nelson, C. E., Morgan, B. A. and Tabin, C. (1995). Sonic hedgehog is an endodermal signal inducing *Bmp-4* and *Hox* genes during induction and regionalization of the chick hindgut. *Development* **121**, 3163-3174.
- Roberts, D., Smith, D. M., Goff, D. J. and Tabin, C. (1998). Epithelial-mesenchymal signaling during the regionalization of the chick gut. *Development* **125**, 2791-2801.
- Rubin, D. C., Swietlicki, E. and Gordon, J. I. (1994). Use of isografts to study proliferation and differentiation program of mouse stomach epithelia. *Am. J. Physiol.* **267**, 27-39.
- Sakiyama, J.-i., Yokouchi, Y. and Kuroiwa, A. (2001). *HoxA* and *HoxB* cluster genes subdivide the digestive tract into morphological domains during chick development. *Mech. Dev.* **101**, 233-236.
- Smith, D. M., Nielsen, C., Tabin, C. J. and Roberts, D. (2000). Roles of BMP signaling and Nkx2.5 in patterning at the chick midgut-foregut boundary. *Development* **127**, 3671-3681.
- Sukegawa, A., Narita, T., Kameda, T., Saitoh, K., Iba, H., Yasugi, S. and Fukuda, K. (2000). The concentric structure of the developing gut is regulated by Sonic hedgehog derived from endodermal epithelium. *Development* **127**, 1971-1980.
- Takahashi, Y., Imanaka, T. and Takano, T. (1998). Spatial pattern of smooth muscle differentiation is specified the epithelium in the stomach of mouse embryo. *Dev. Dyn.* **212**, 448-460.



- Thompson, E. M., Fleming, K. A., Evans, D. J., Fundele, R., Surani, M. A. and Wright, N. A. (1990). Gastric endocrine cells share a clonal origin with other gut cell lineages. *Development* **110**, 477-481.
- Tissier-Seta, J.-P., Mucchielli, M.-L., Mark, M., Mattei, M.-G., Goridis, C. and Brunet, J.-F. (1995). Barx1, a new mouse homeodomain transcription factor expressed in cranio-facial ectomesenchyme and the stomach. *Mech. Dev.* **51**, 3-15.
- Trier, M., O'Connell, S., Gleigerman, A., Price, J., Szeto, D. P., Burgess, R., Chuang, P.-T., McMahon, A. P. and Rosenfeld, M. G. (2001). Hedgehog signaling is required for pituitary gland development. *Development* **128**, 377-386.
- Van den Brink, G. R., Hardwick, J. C. H., Tytgat, G. N. J., Brink, M. A., Ten Kate, F. J., van Deventer, S. J. H. and Peppelenbosch, M. P. (2001). Sonic Hedgehog regulates gastric gland morphogenesis in man and mouse. *Gastroenterology* **121**, 317-328.
- Warot, X., Fromental-Ramain, C., Fraulob, V., Chambon, P. and Dollé, P. (1997). Gene-dosage dependent effects of the *Hoxa-13* and *Hoxd-13* mutations on morphogenesis of the terminal parts of the digestive and urogenital tracts. *Development* **124**, 4781-4791.
- Wilkinson, D. G. and Nieto, M. A. (1993). Detection of messenger RNA by *in situ* hybridization to tissue sections and whole mounts. *Methods Enzymol.* **225**, 361-372.
- Wolgemuth, D. J., Behringer, R. R., Mostoller, M. P., Brinster, R. L. and Palmiter, R. D. (1989). Transgenic mice overexpressing the mouse homoeobox-containing gene Hox-1.4 exhibit abnormal gut development. *Nature* **337**, 464-467.
- Yasugi, S. and Fukada, K. (2000). The mesenchymal factors regulating epithelial morphogenesis and differentiation of the chicken stomach. *Zool. Sci.* **17**, 1-9.
- Yokouchi, Y., Sakiyama, J.-i. and Kuroiwa, A. (1995). Coordinated expression of *Abd-B* subfamily genes of the *HoxA* complex in the developing digestive tract of chick embryo. *Dev. Biol.* **169**, 76-89.
- Zakany, J. and Duboule, D. (1999). Hox genes and the making of sphincters. *Nature* **401**, 761-762.
